# Supplementary material
Source: PubMed Central journal article supplement (PMC3986339)

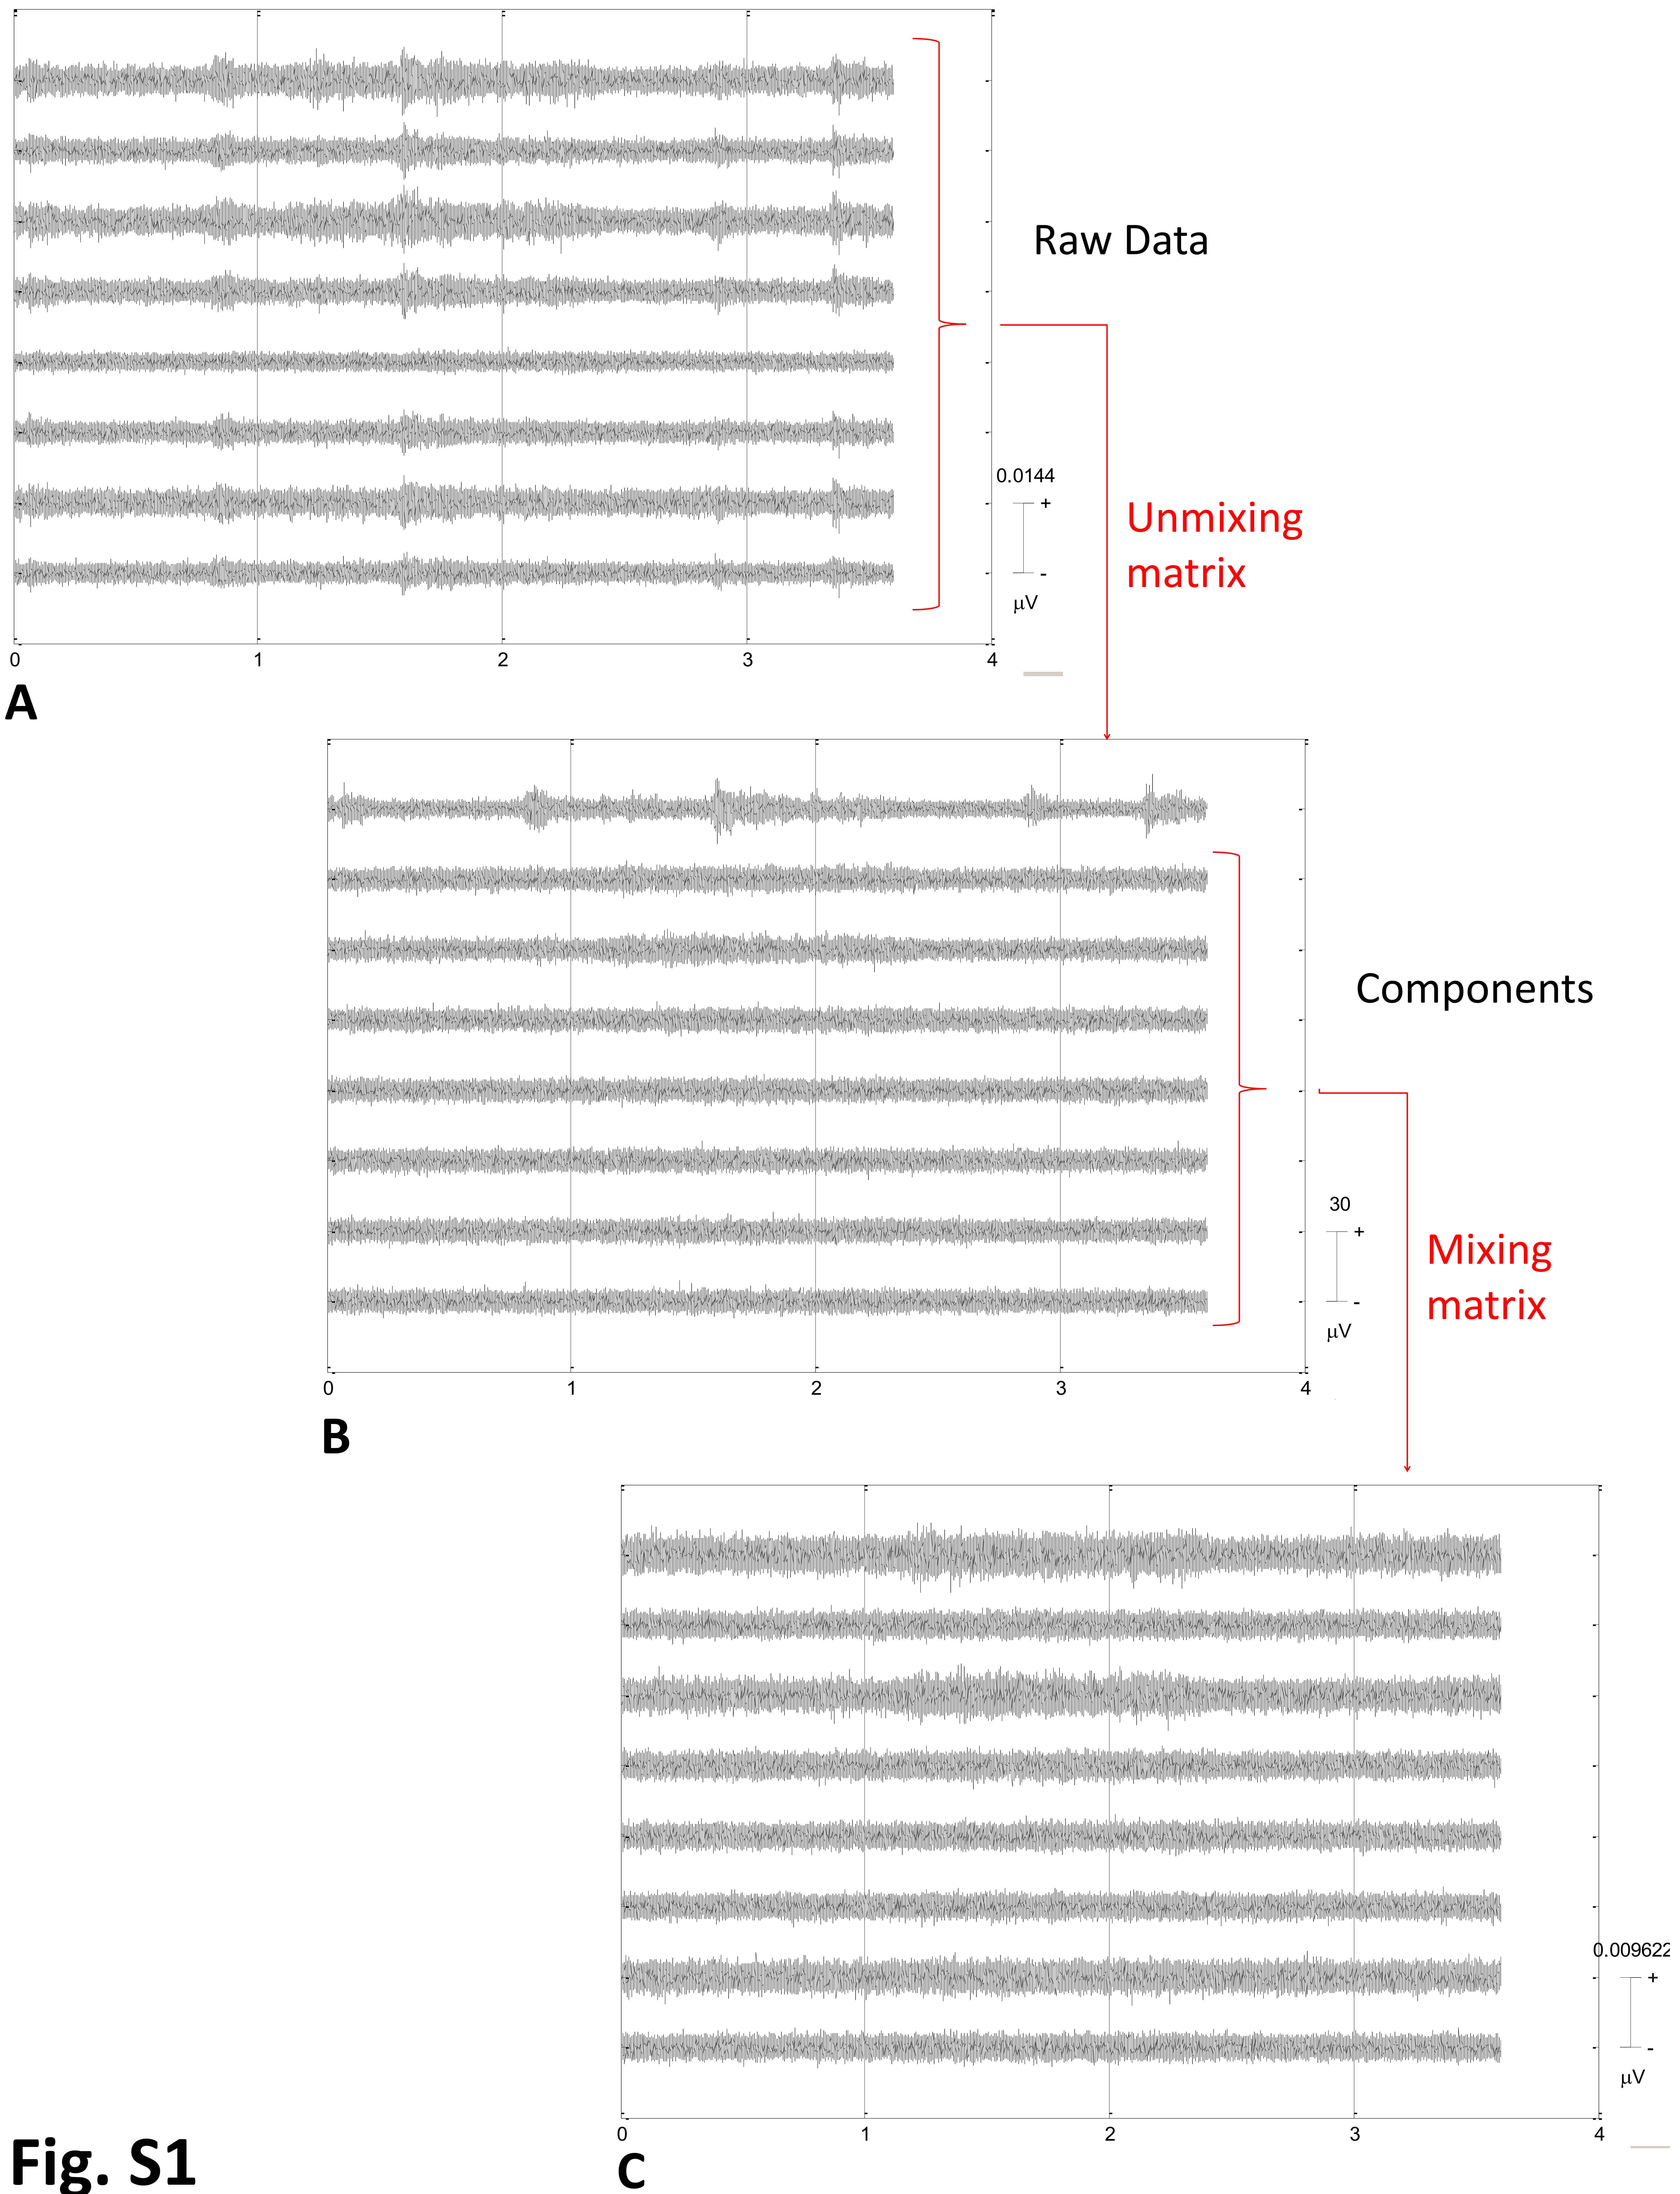

**Fig. S1**

Supplement: NIHMS548382-supplement-02.pdf [file NIHMS548382-supplement-02.pdf]

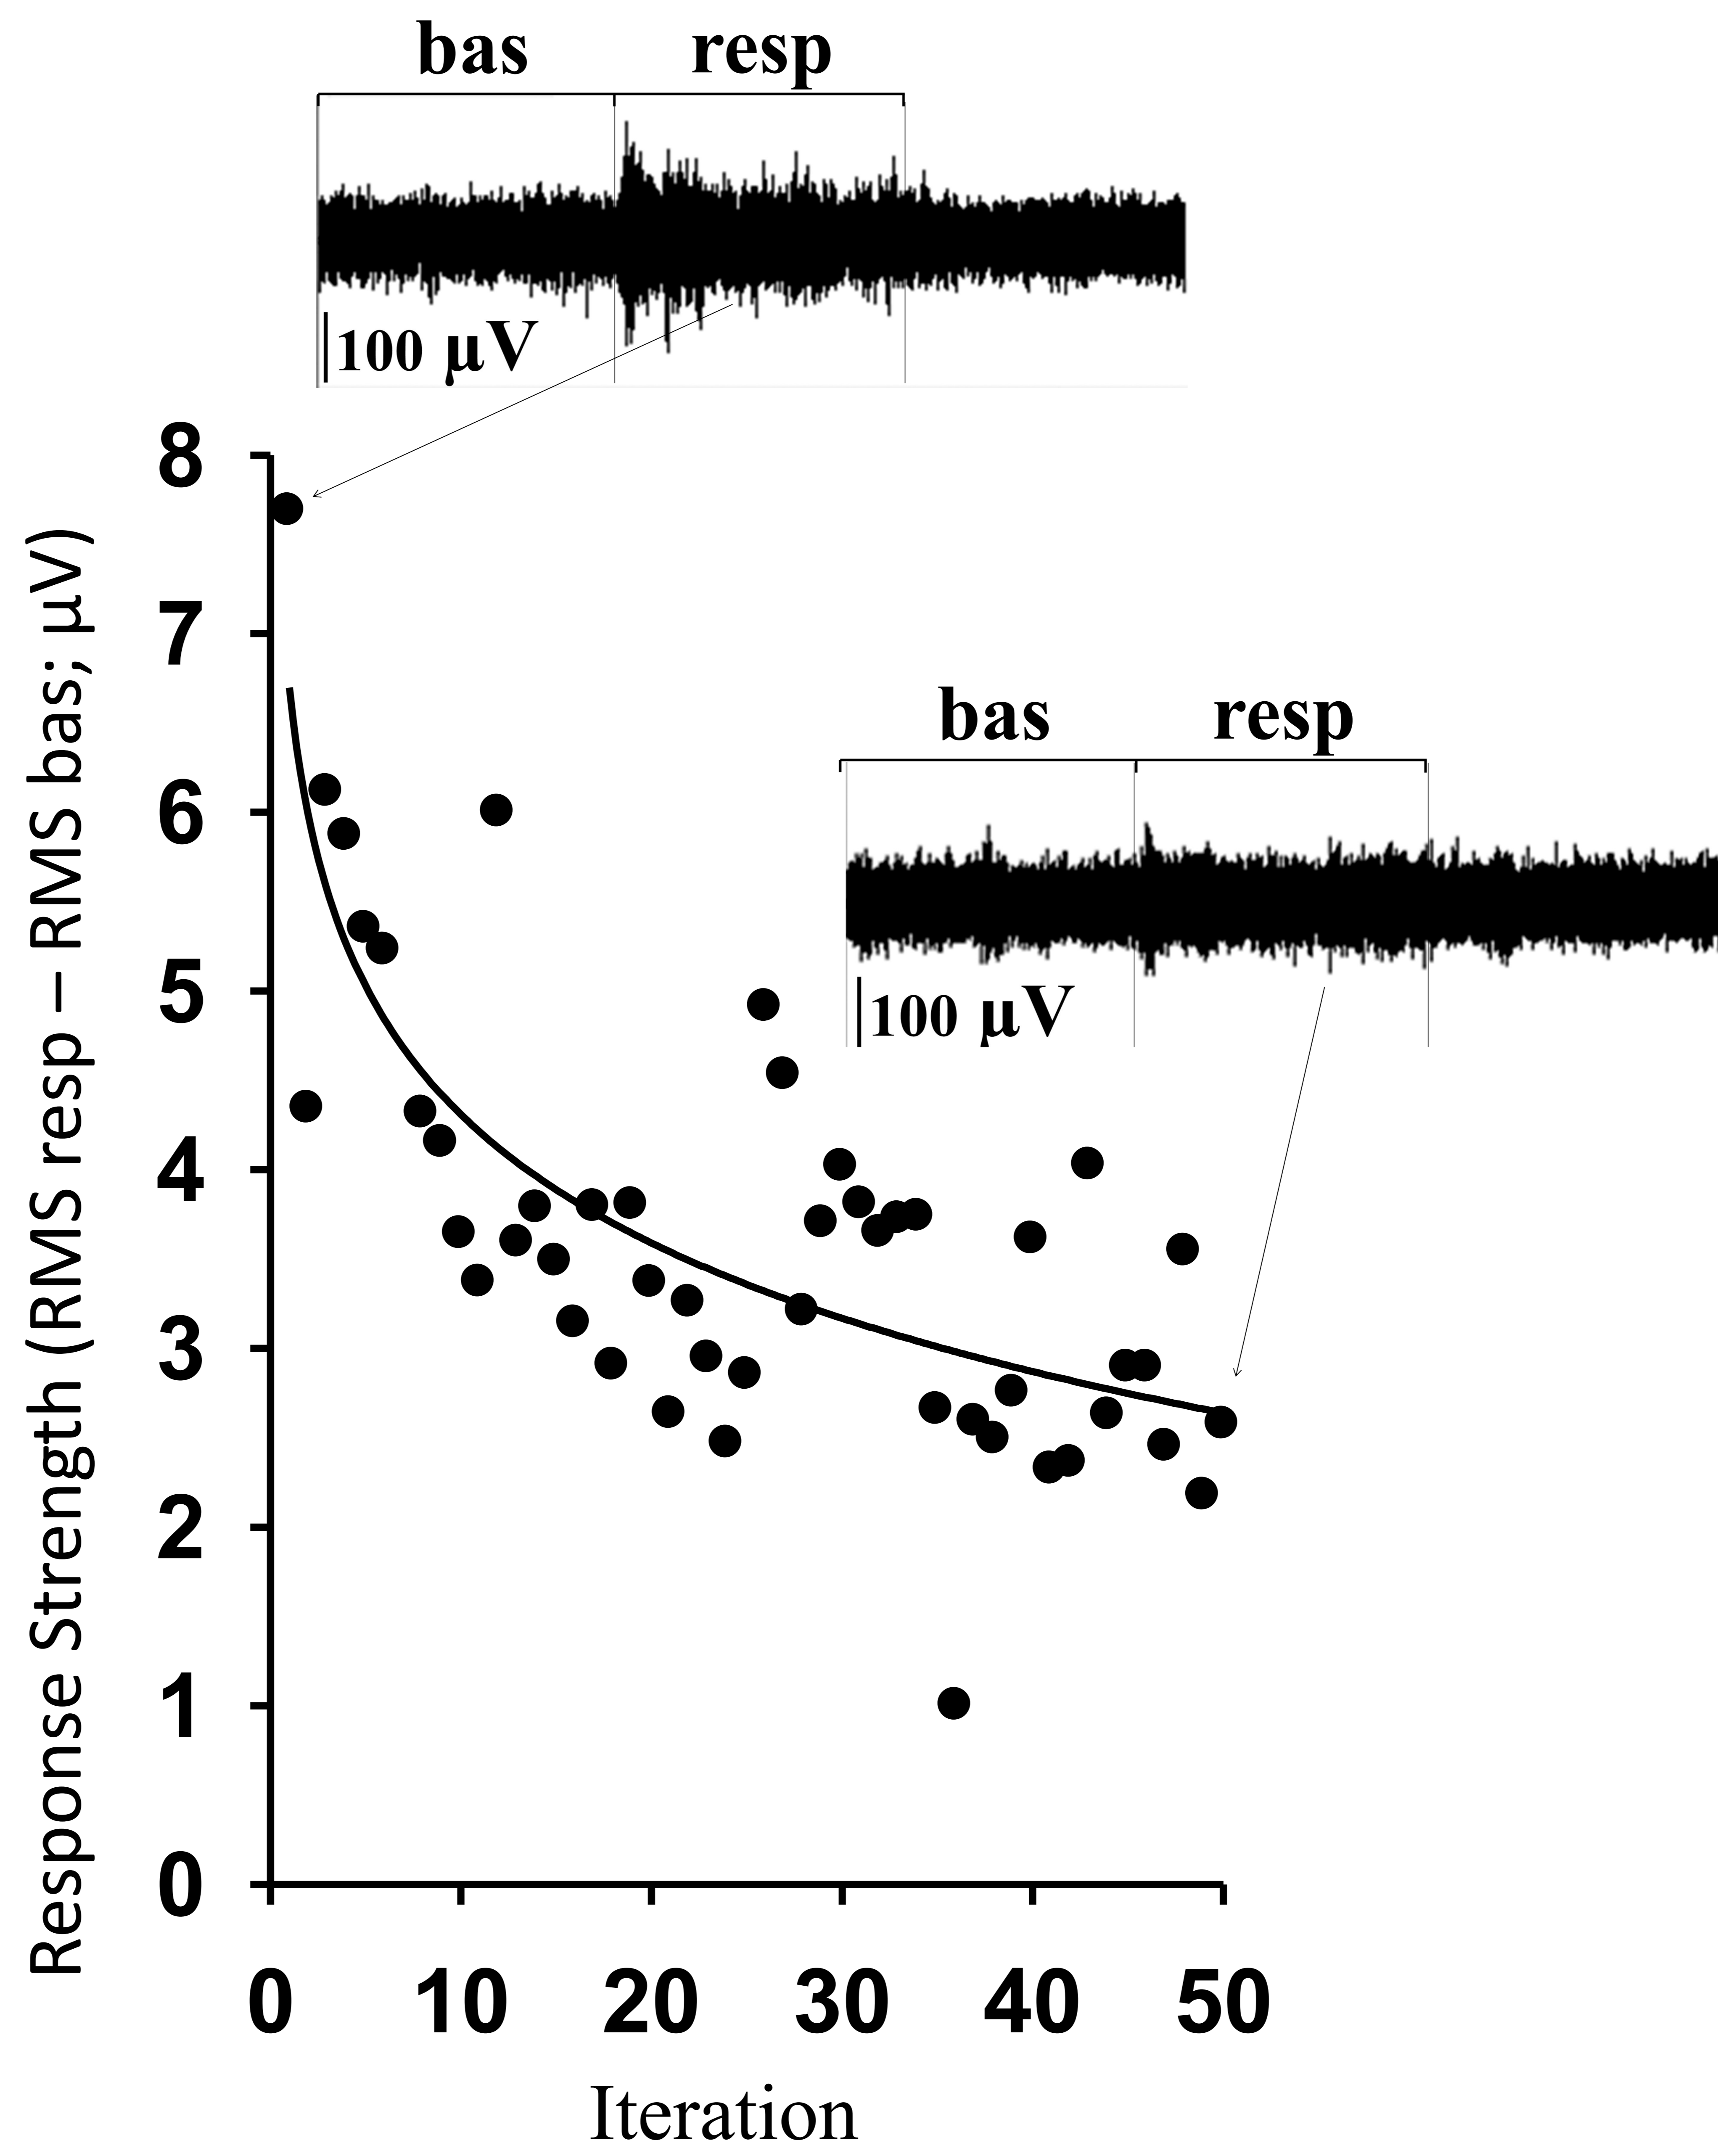

**Fig. S2**

Supplement: NIHMS548382-supplement-03.pdf [file NIHMS548382-supplement-03.pdf]

# Habituation to 2 different locations (HabLocation)

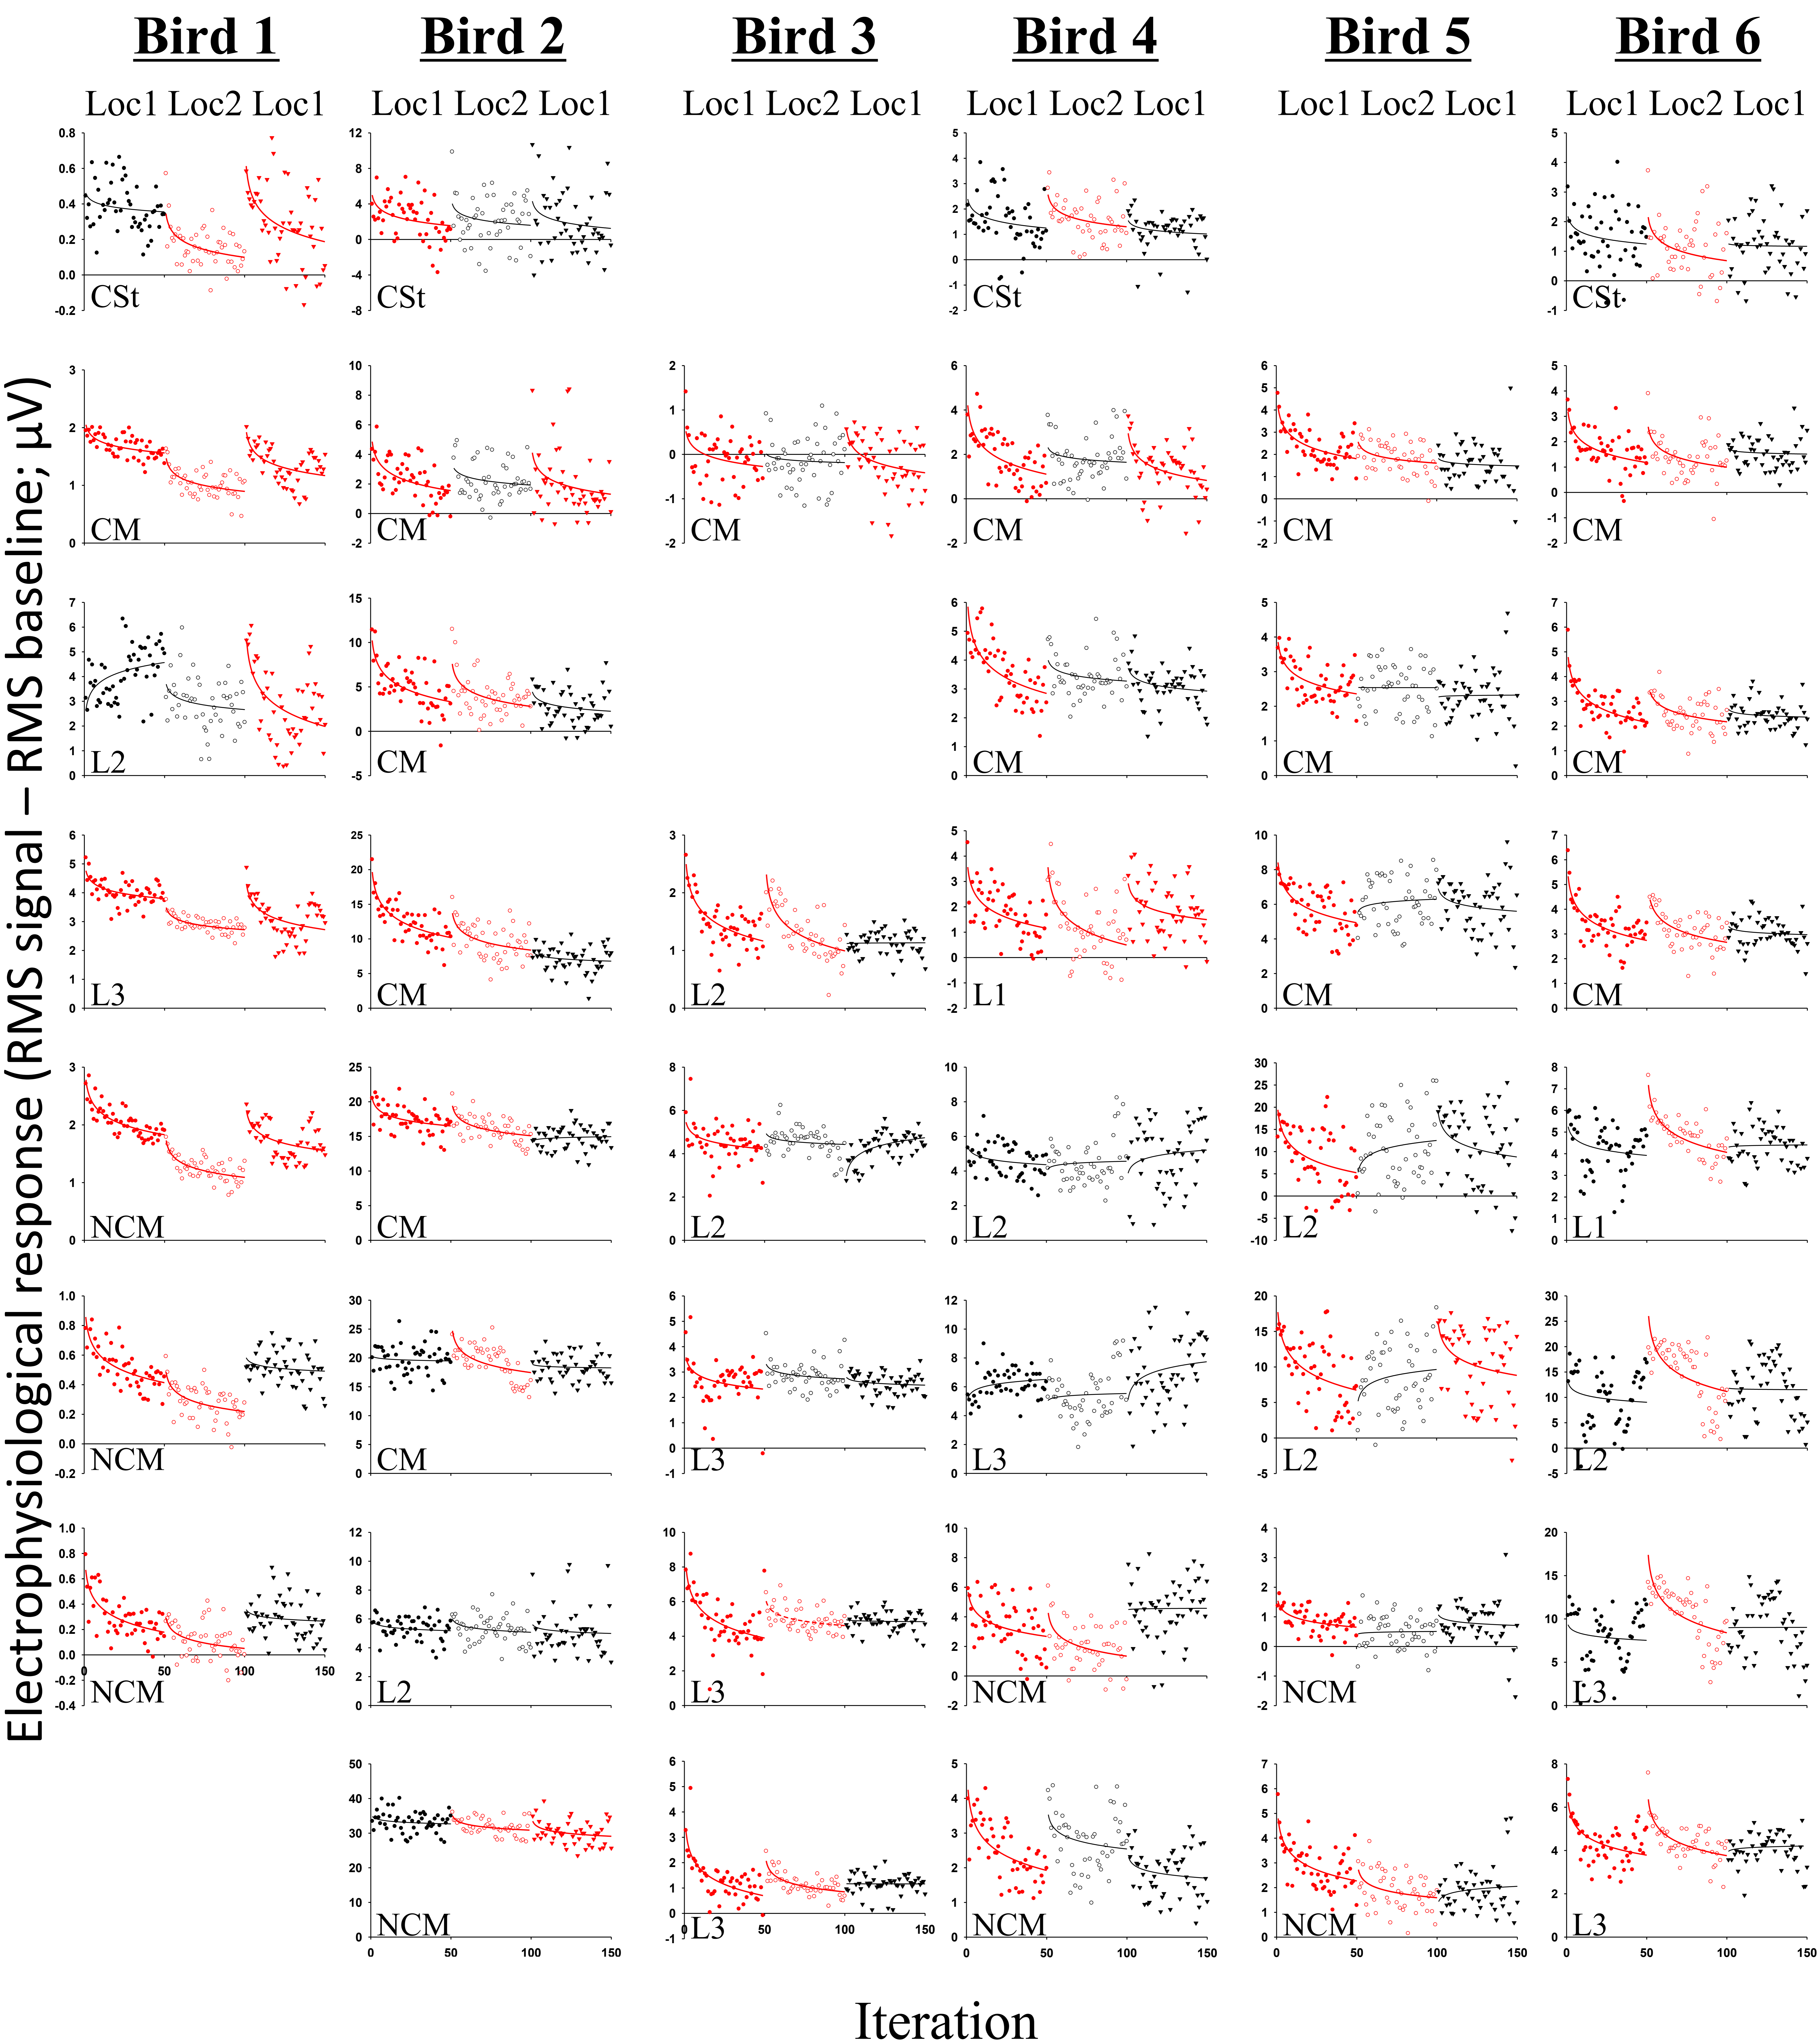

**Fig. S4**

Supplement: NIHMS548382-supplement-05.pdf [file NIHMS548382-supplement-05.pdf]

# Habituation to 8 different interspersed stimuli (MixAcoustic)

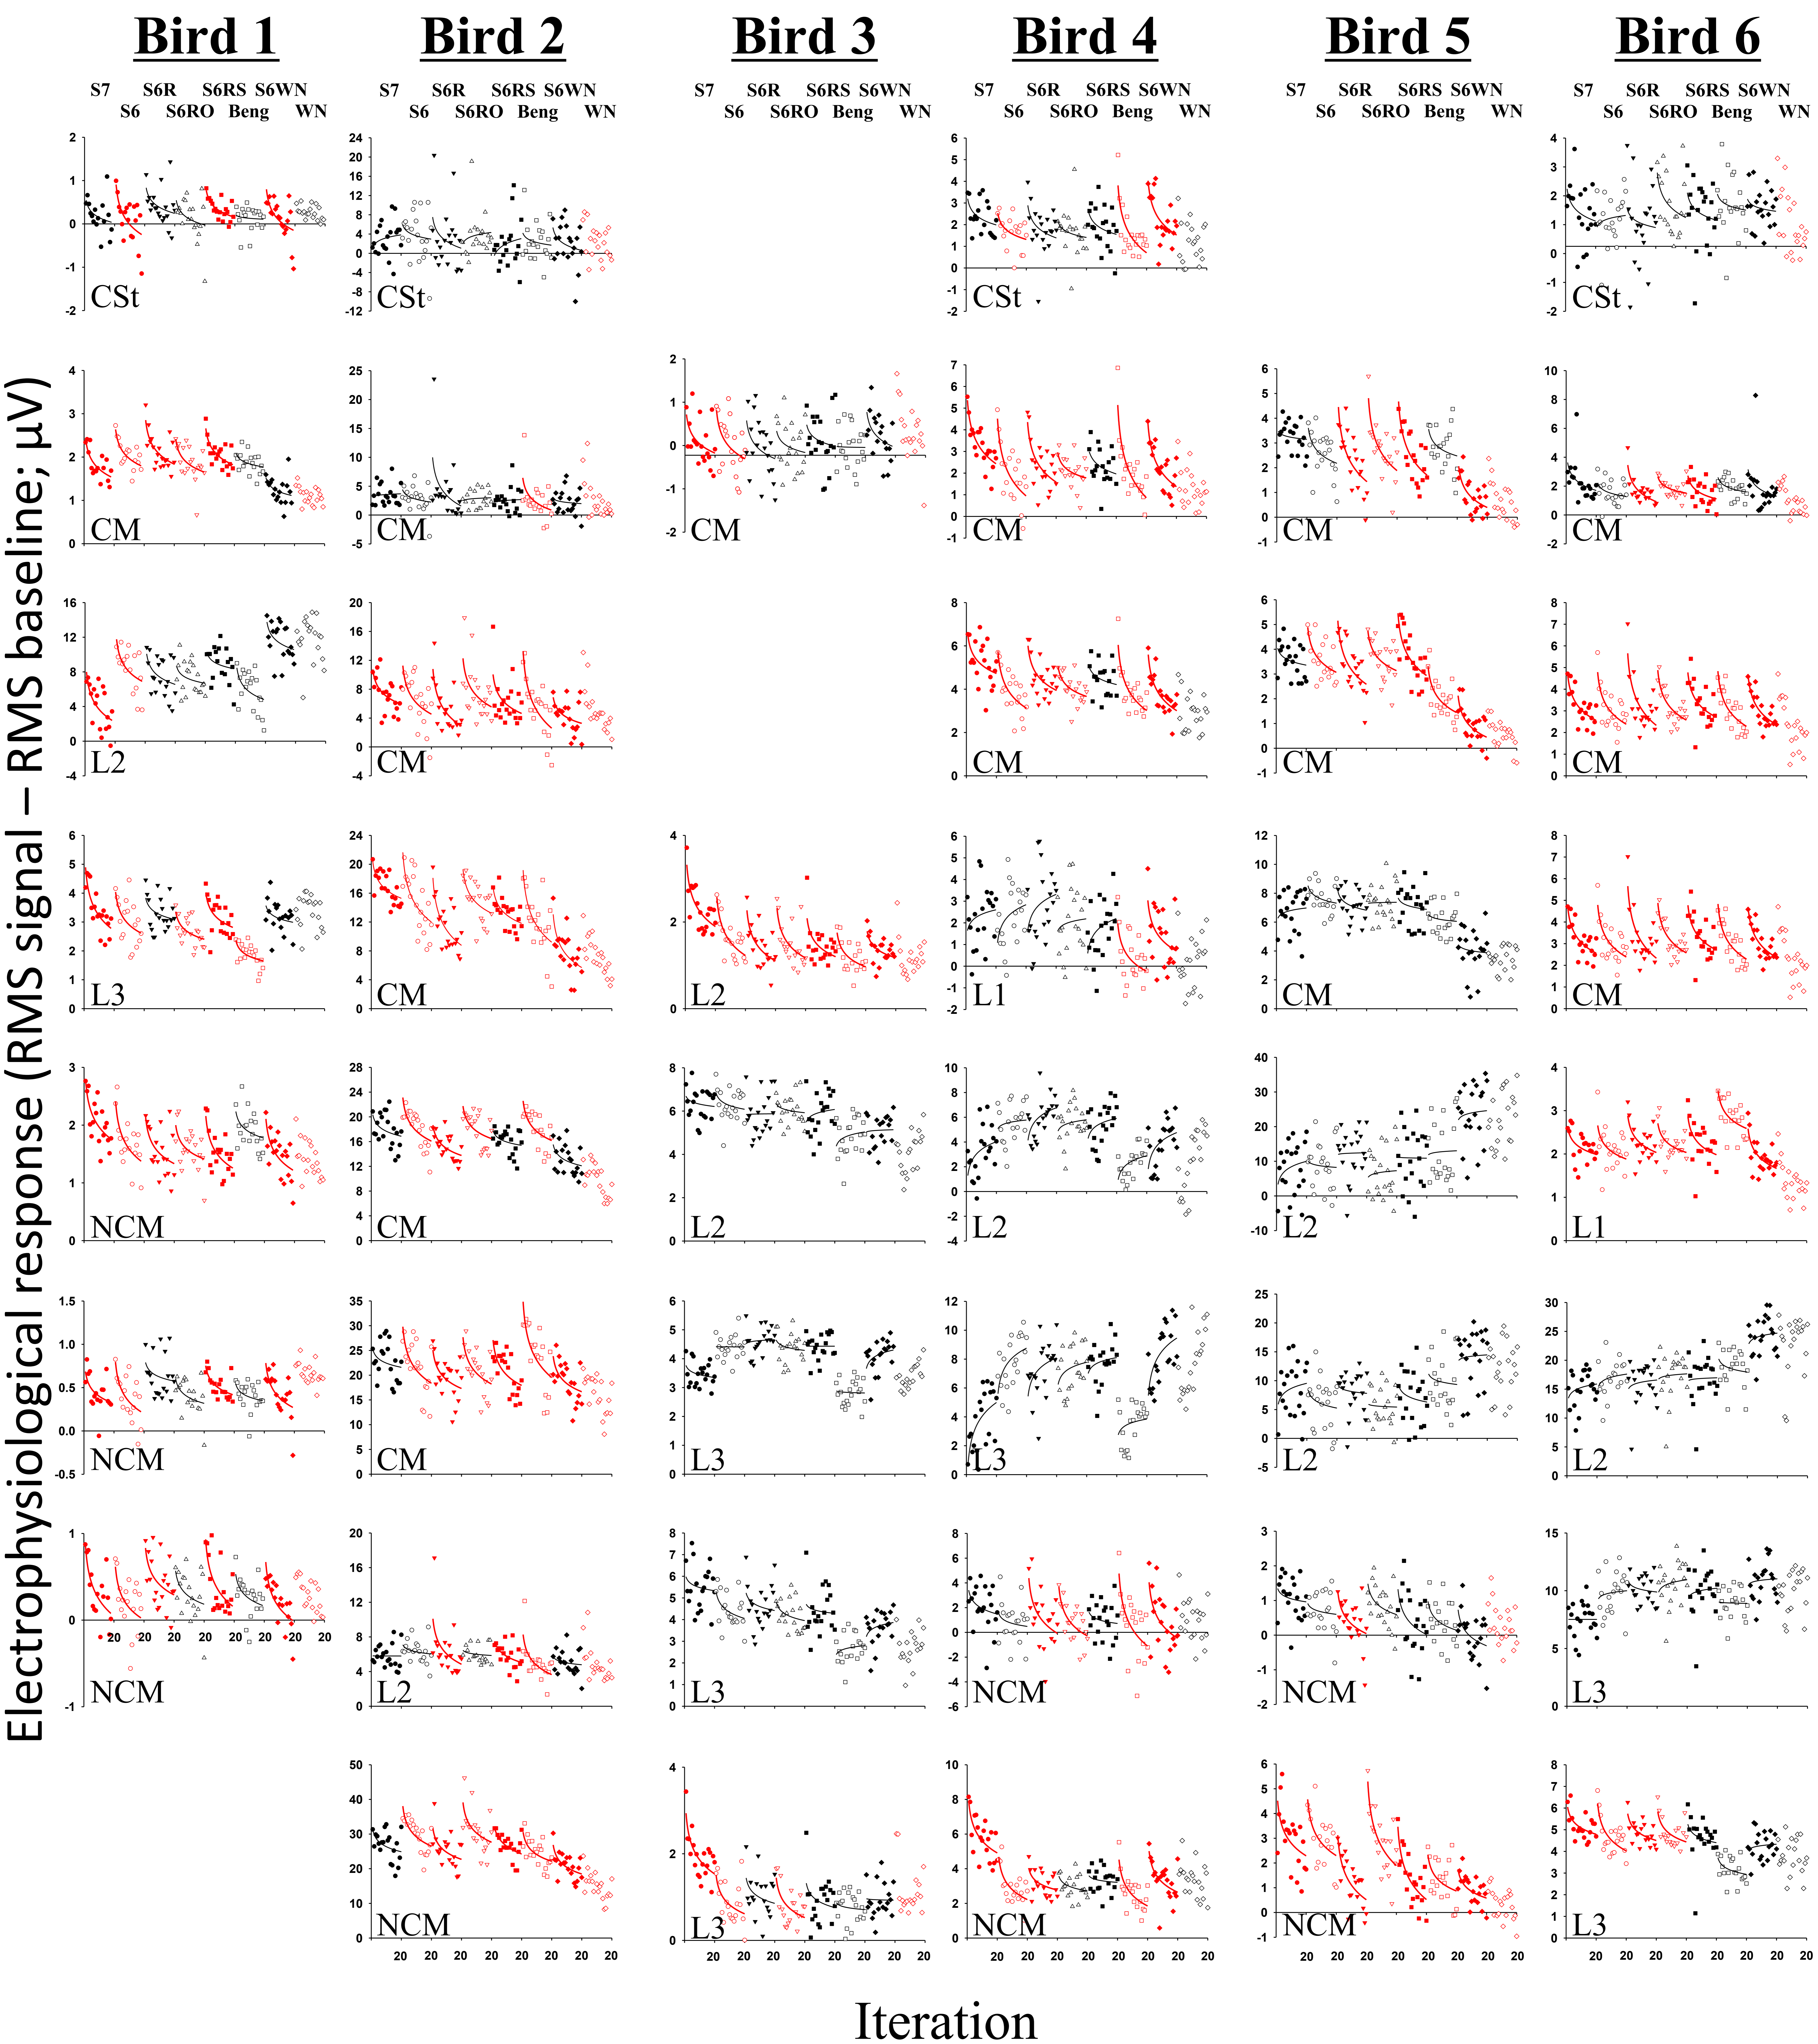

**Fig. S5**

Supplement: NIHMS548382-supplement-06.pdf [file NIHMS548382-supplement-06.pdf]

# Habituation to playback from 8 different locations (MixLocation)

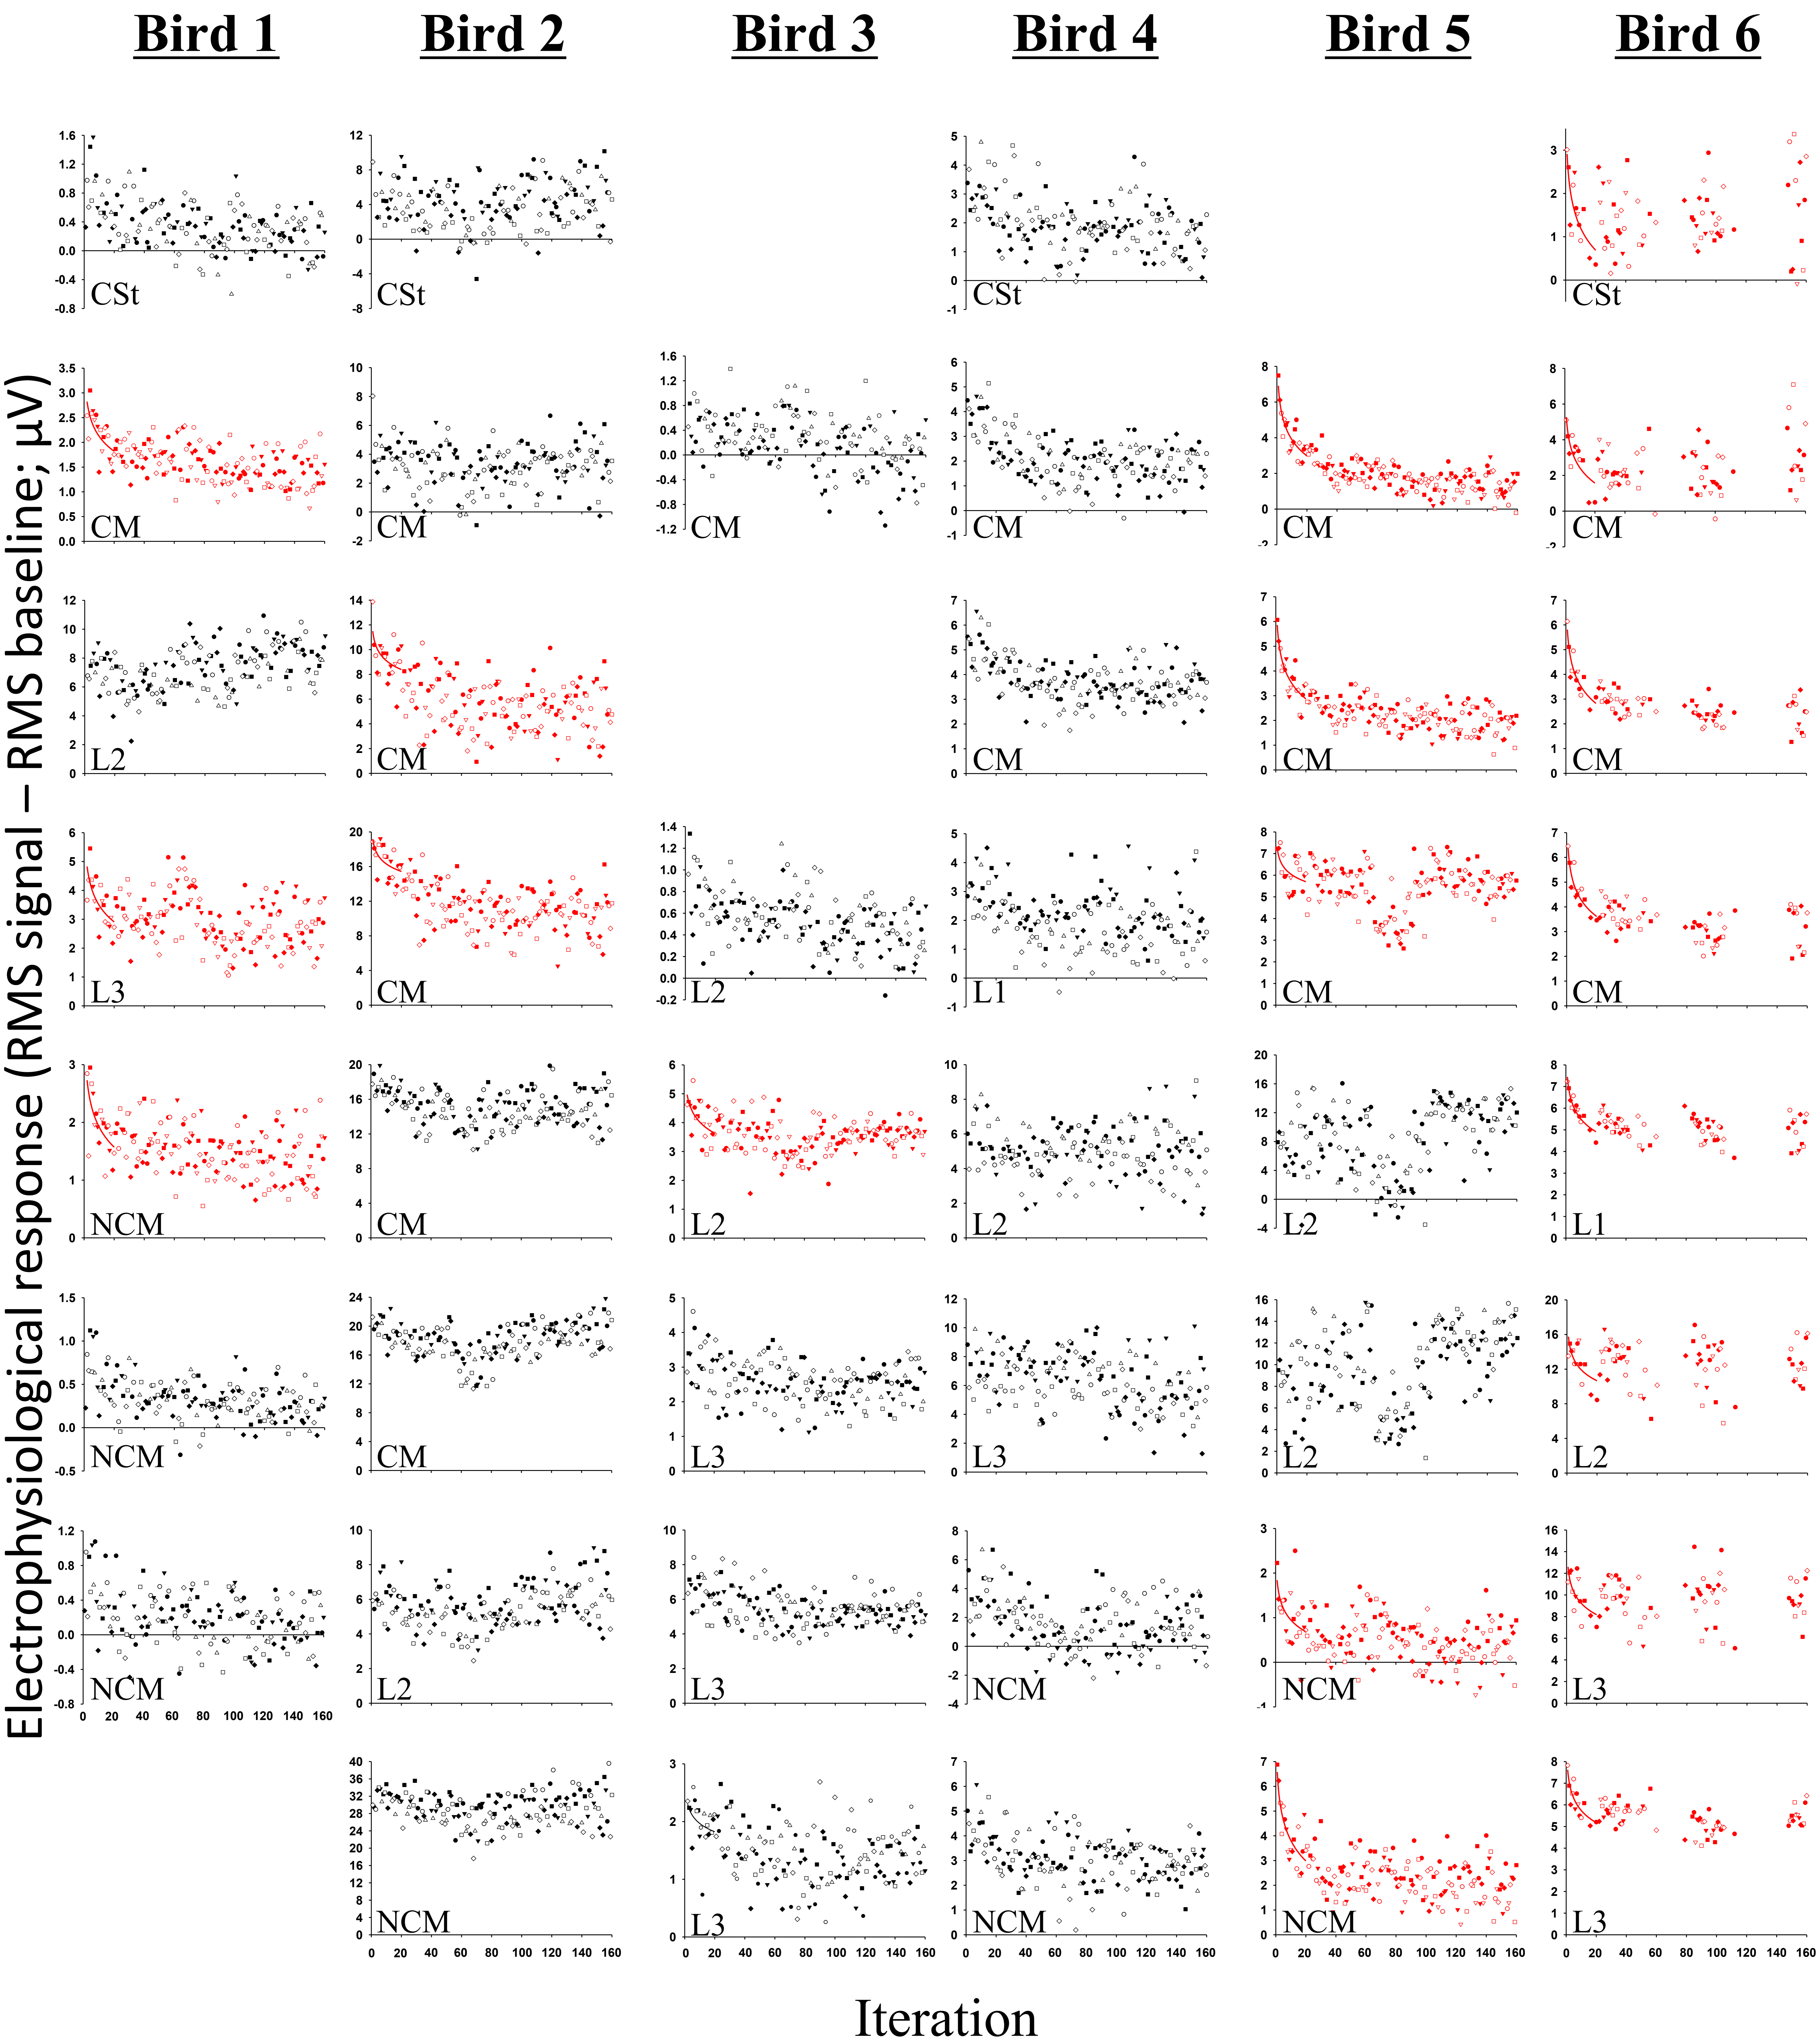

**Fig. S6**

Supplement: NIHMS548382-supplement-07.pdf [file NIHMS548382-supplement-07.pdf]

# Habituation to playback from 8 different locations (MixLocation)

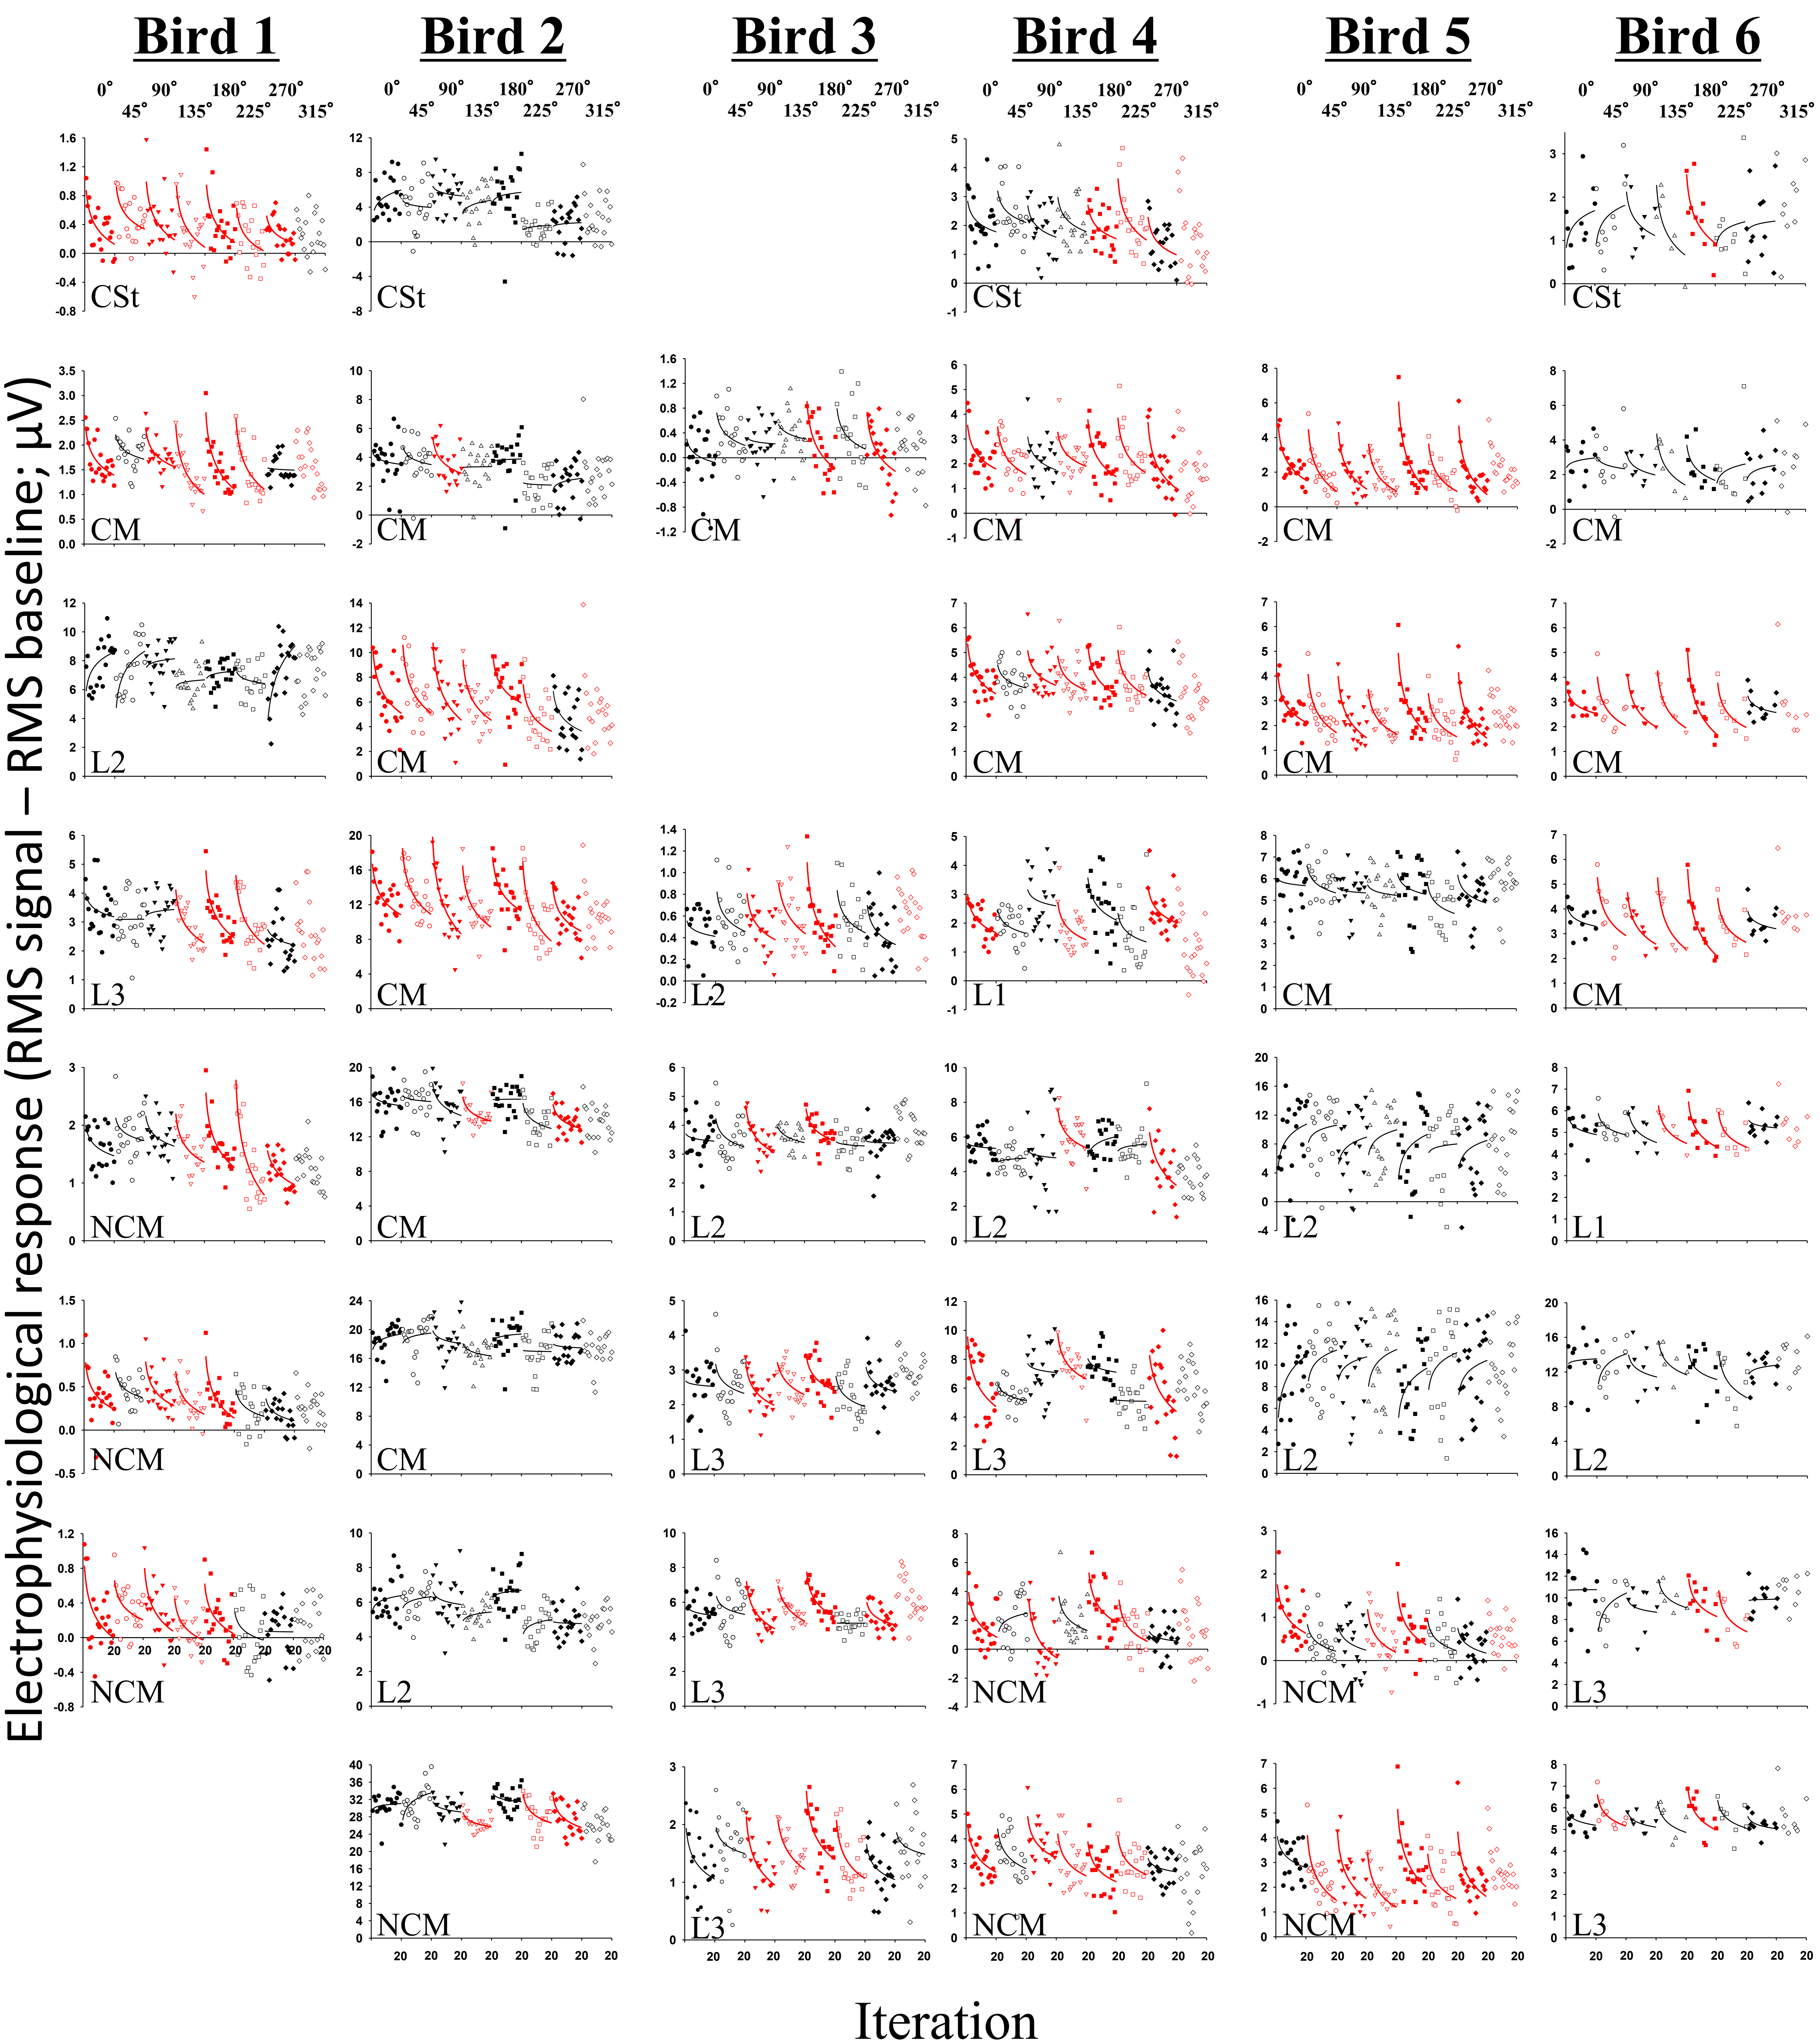

**Fig. S7**

Supplement: NIHMS548382-supplement-08.pdf [file NIHMS548382-supplement-08.pdf]

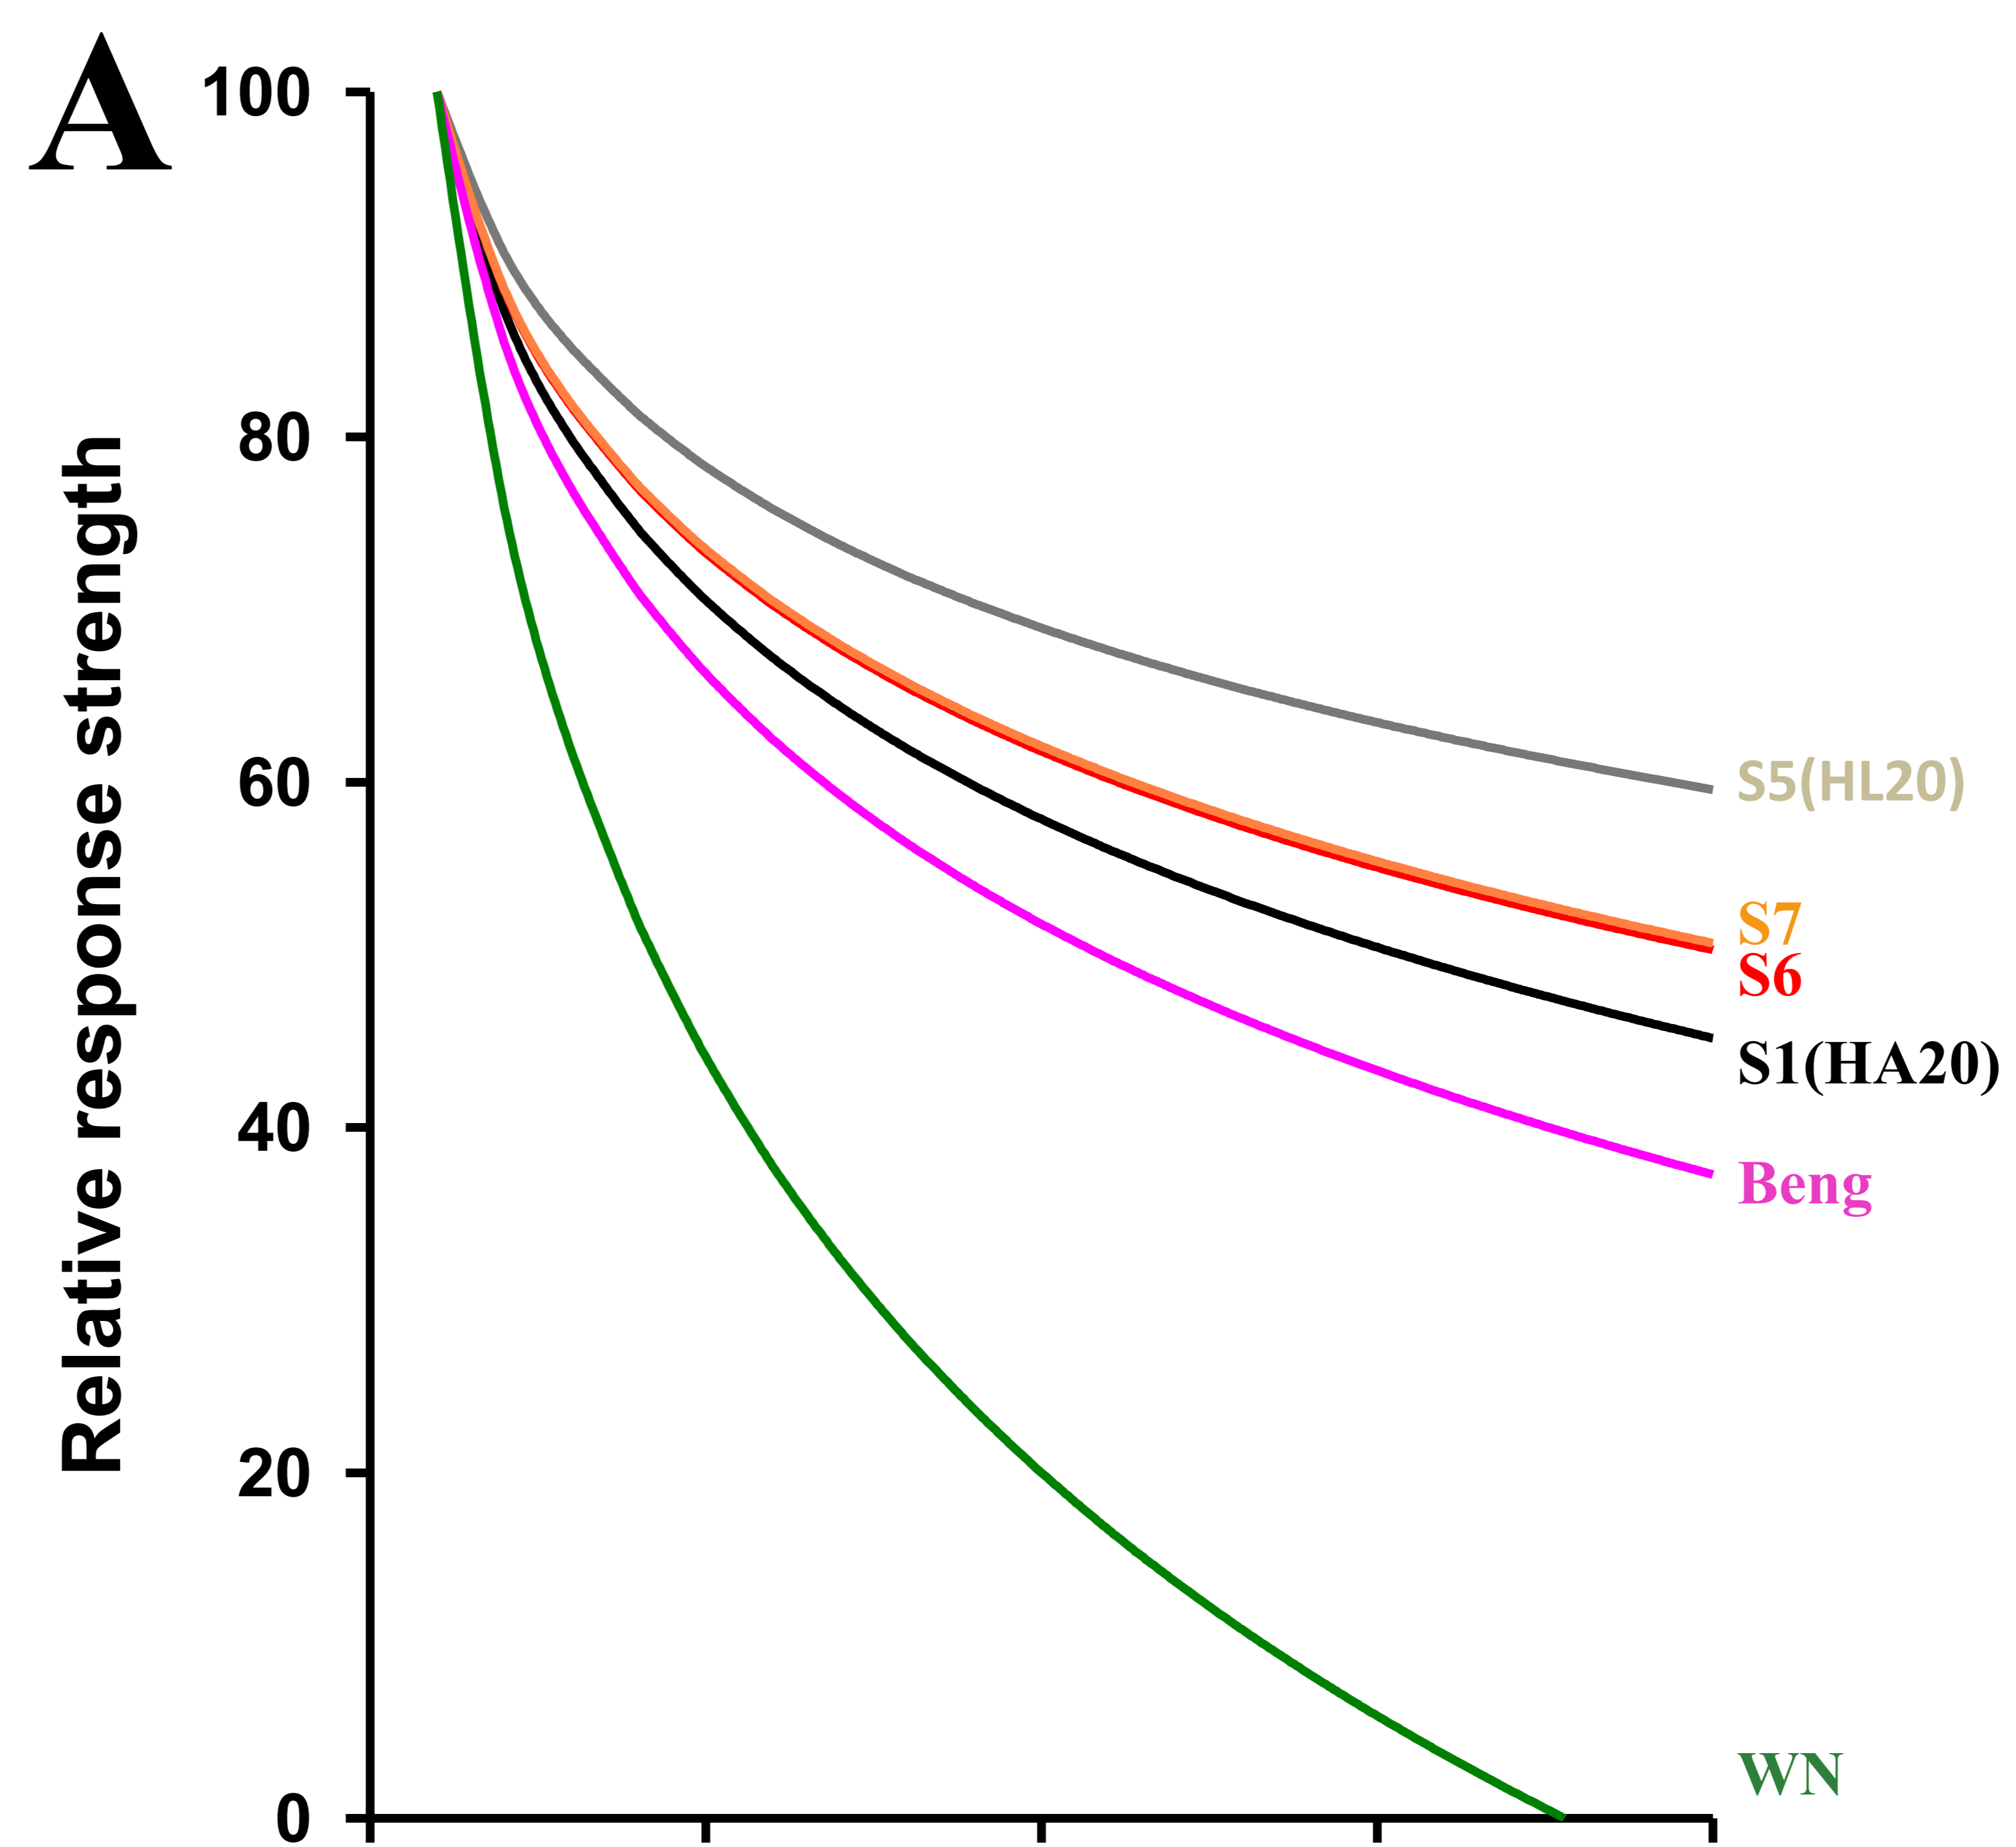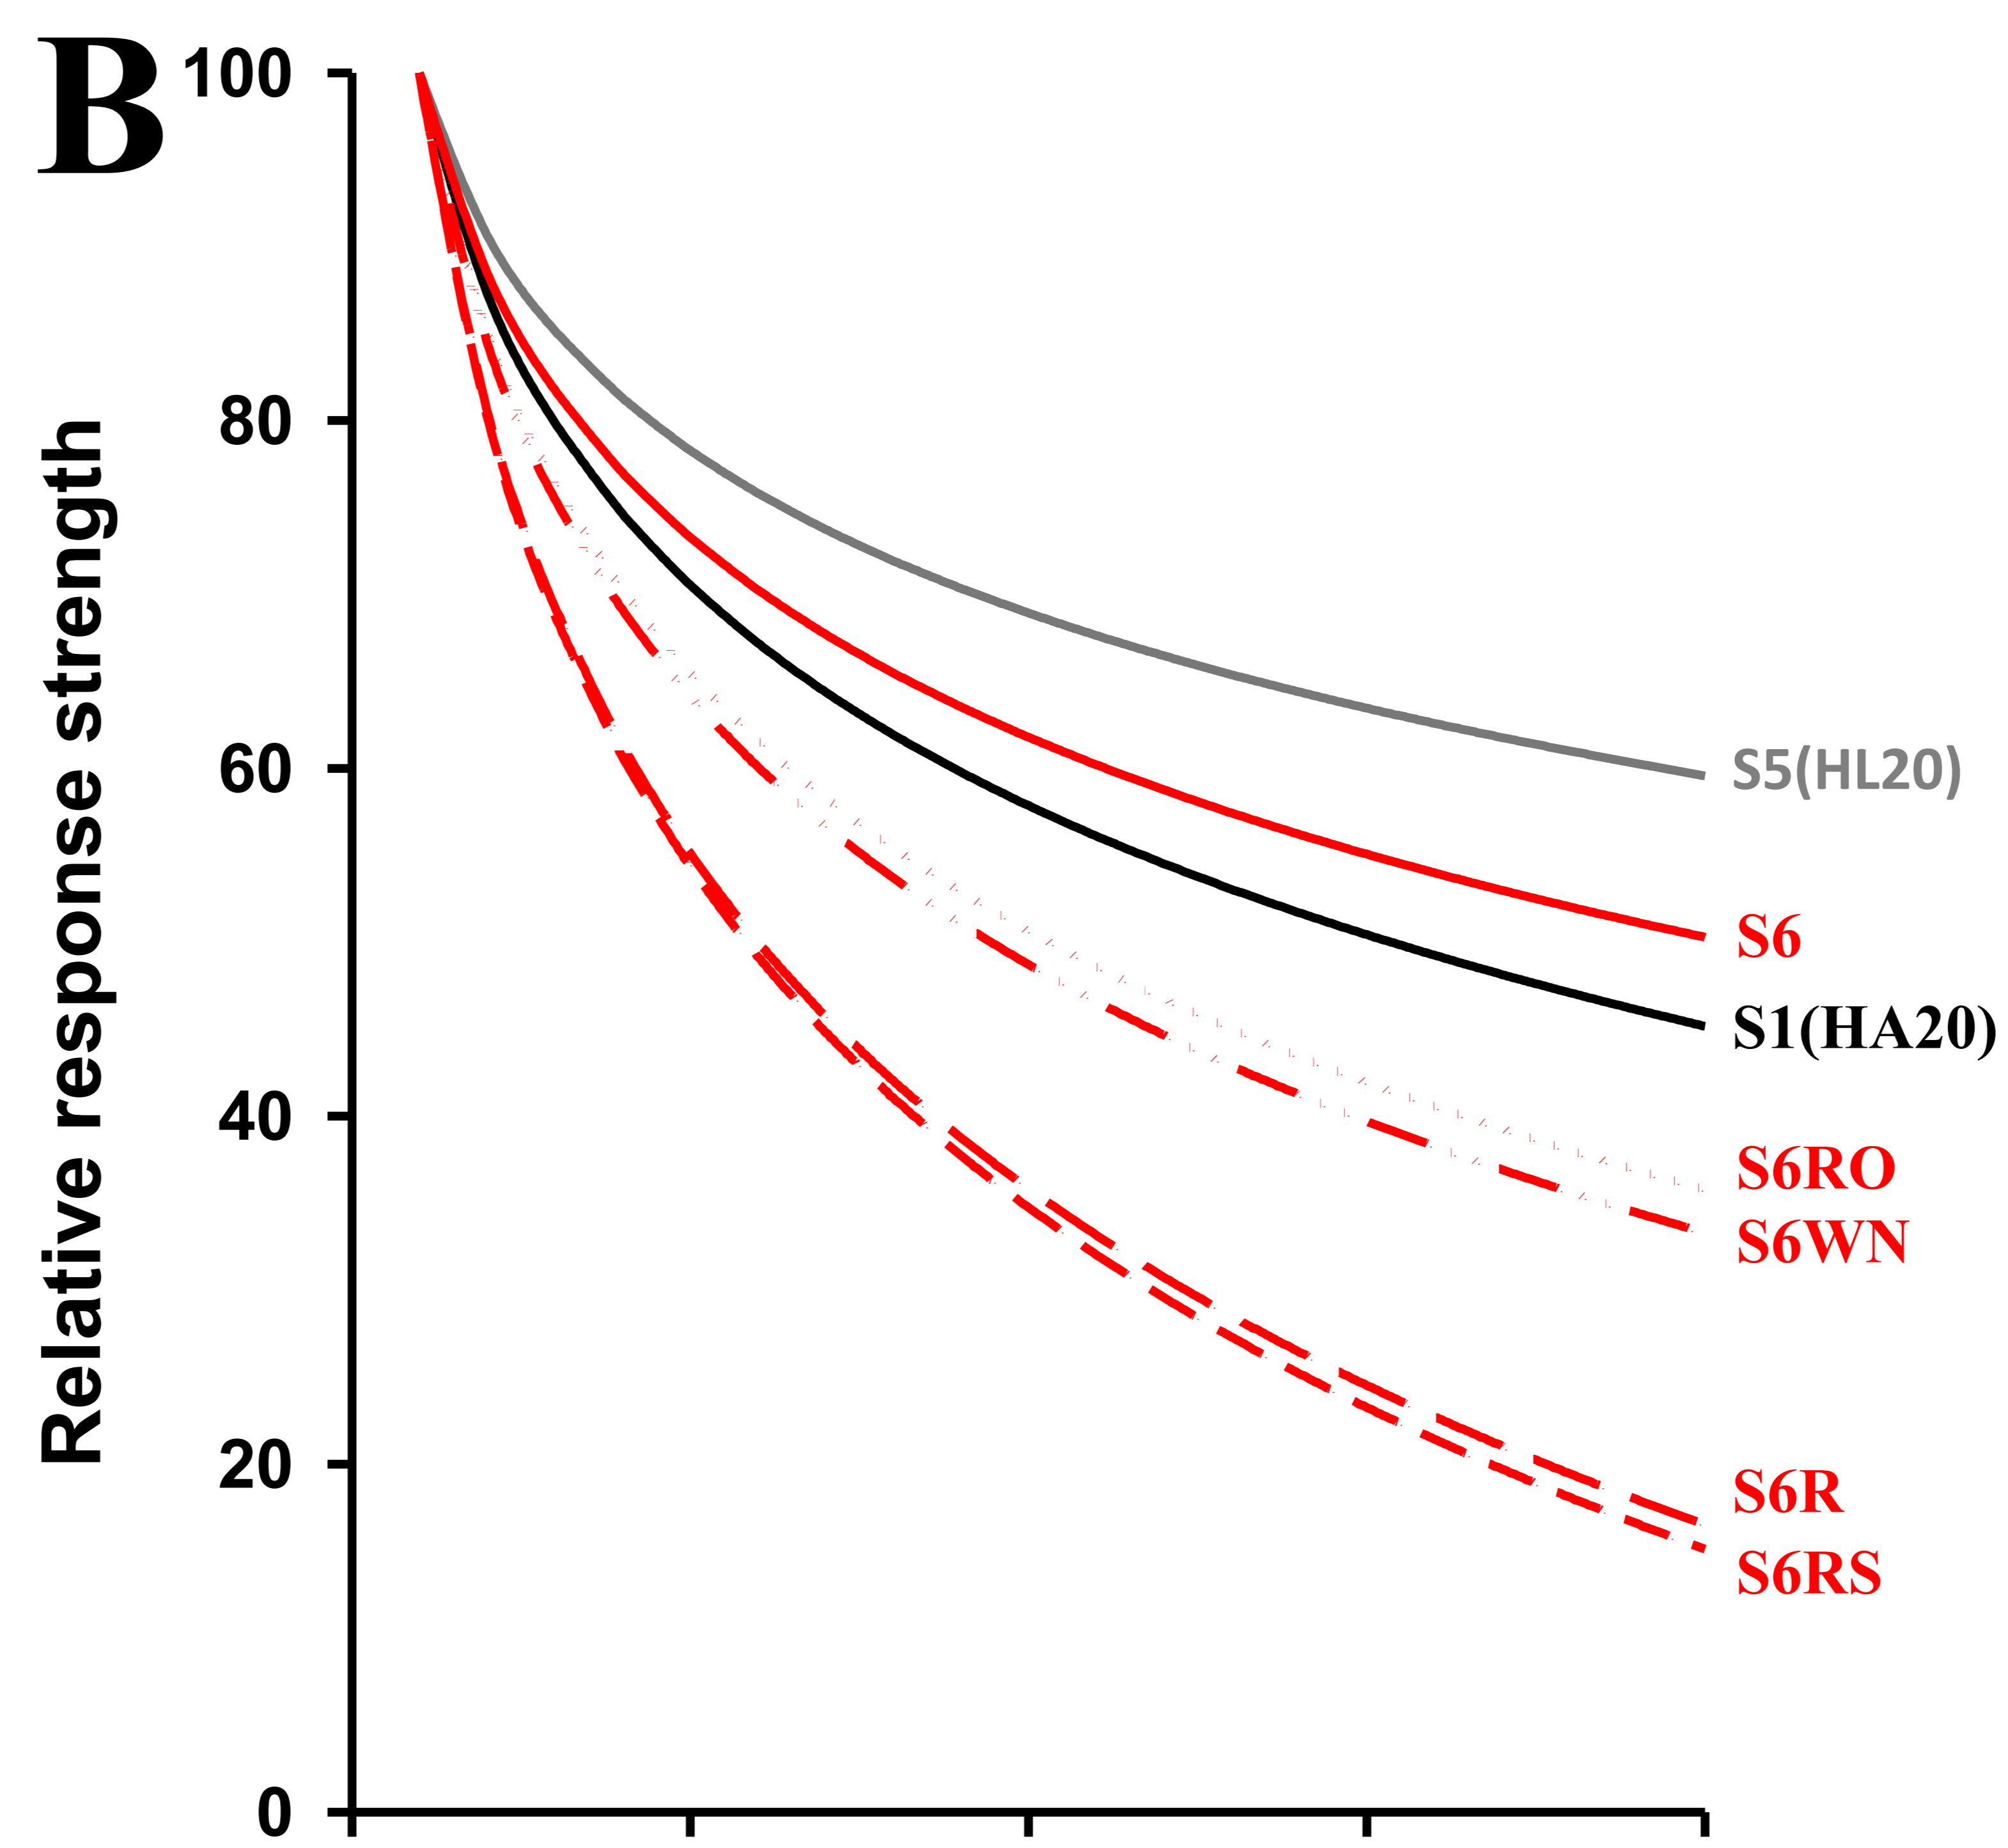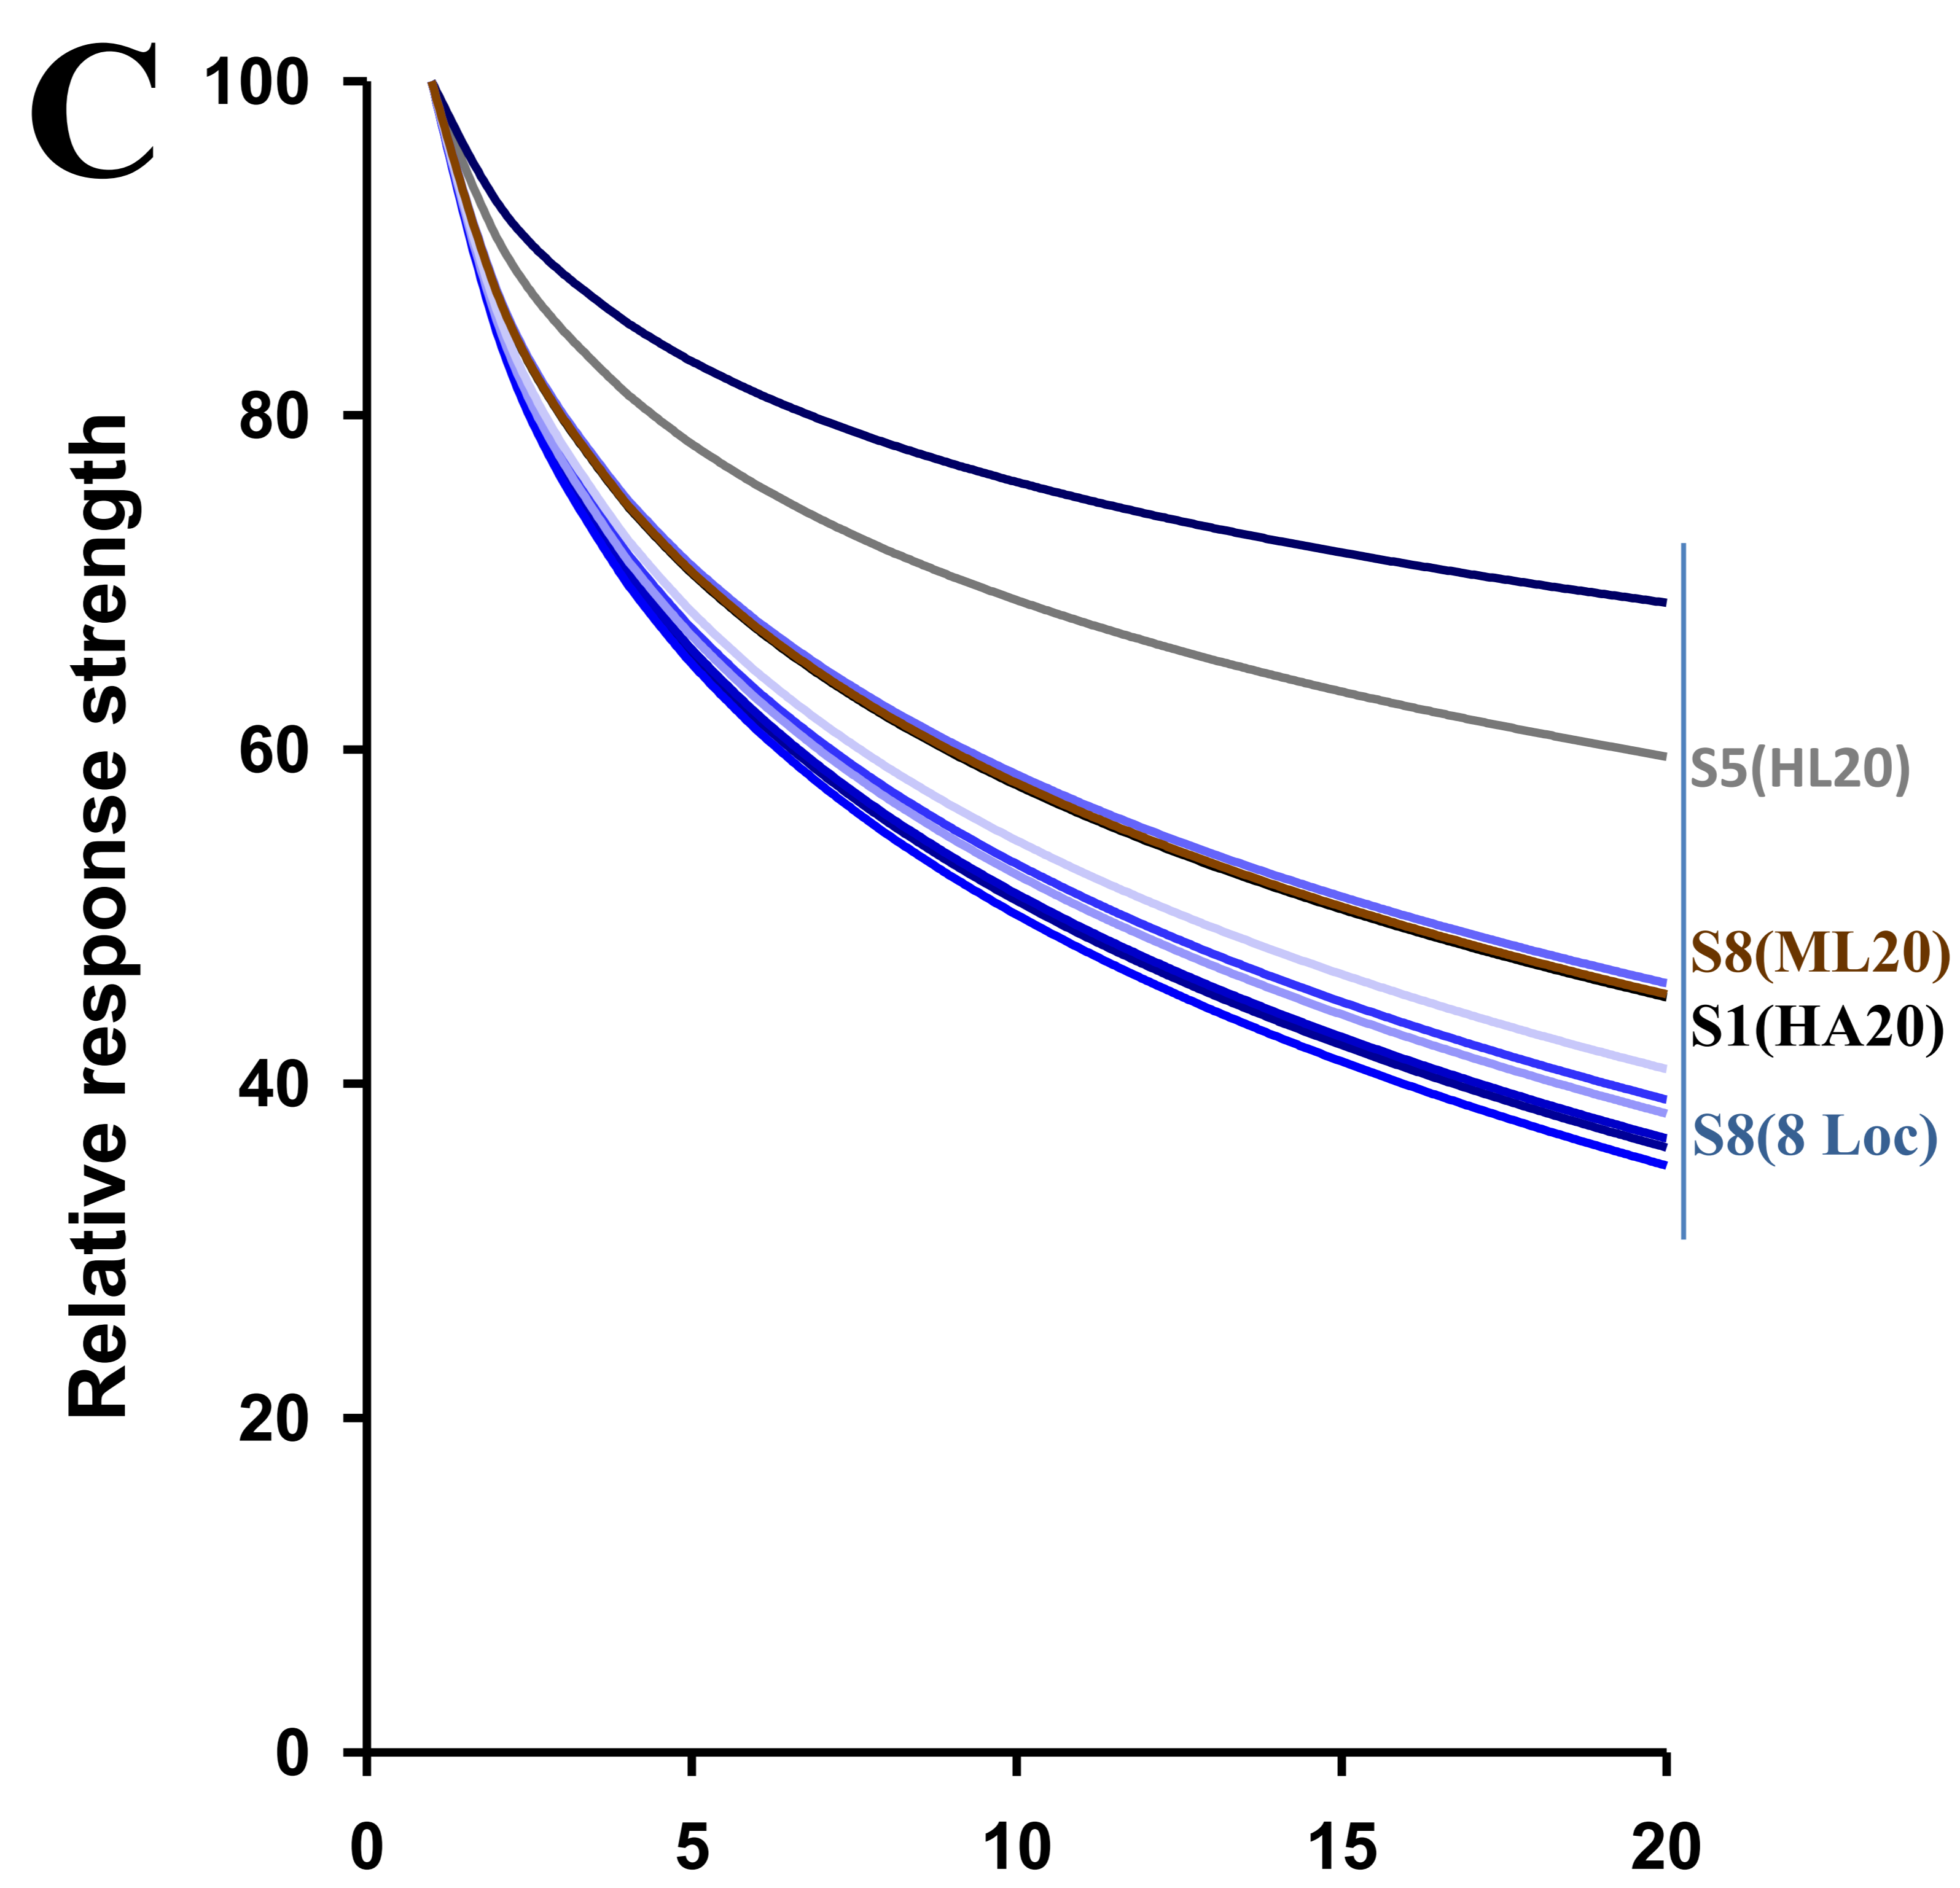

**Fig. S8**

Supplement: NIHMS548382-supplement-09.pdf [file NIHMS548382-supplement-09.pdf]
